# Supplementary material for: Establishing Consensus Annotation for the Hallmarks of Cancer
Source: Research Square preprint supplement (doi:10.21203/rs.3.rs-119639/v1), 2020-12-10
Supplement: Supplementary file 1 [file a52de4c043932af3f2f685b3.xlsx]

## Sheet: Sheet1
Methods	Source	Experts involved		Size(pathway/GO)		Gene Number		Hallmark Included
GO1	Gene Ontology	Yes		57		10386		10 hallmarks
GO2	Gene Ontology	Unknown		40(1 obsolete)		10346		10 hallmarks
GO3	Gene Ontology	Yes		67		9164		8 hallmarks
GO4	Gene Ontology	Unknown		35		3078		8 hallmarks
PW1	MSigDB &Kegg	Yes		14		2172		Unknown
